# Supplementary material for: Salivary glands regenerate after radiation injury through SOX2‐mediated secretory cell replacement
Source: PubMed Central journal article supplement (PMC5840548; doi:10.15252/emmm.201708051), 2018-01-15
Supplement: EMMM-10-e8051-s001.pdf [file EMMM-10-e8051-s001.pdf]

## Appendix Contents

| <b>Page</b> | <b>Content</b>                                                                                           |
|-------------|----------------------------------------------------------------------------------------------------------|
| 1           | Table S1: Sequences for mouse primers used for qPCR                                                      |
| 2           | Table S2: Sequences for human primers used for qPCR                                                      |
| 3           | Figure S1: Short-term ablation of SOX2+ cells reduces acinar cell replacement                            |
| 4           | Figure S2: Reinnervation 30 days following transection of the chorda tympani restores the acinar lineage |

**Table S1. Sequences for mouse primers used for qPCR**

| Gene target   | Forward primer sequence        | Reverse primer sequence       |
|---------------|--------------------------------|-------------------------------|
| <i>Aqp5</i>   | TCTACTTCTACTTGCTTTTCCCCTCCTC   | CGATGGTCTTCTTCCGCTCCTCTC      |
| <i>Bak1</i>   | CAACCCCGAGATGGACAACCT          | CGTAGCGCCGGTTAATATCAT         |
| <i>Bax</i>    | TGCTAGCAAACCTGGTGCTCA          | TCACGGAGGAAGTCCAGTGT          |
| <i>Bbc3</i>   | AGCAGCACTTAGAGTCGCC            | CCTGGGTAAGGGGAGGAGT           |
| <i>Ccnd1</i>  | CATCCATGCGGAAAATCGTGG          | AAGACCTCCTCTTCGCACTTC         |
| <i>Cdh1</i>   | GACTGGAGTGCCACCACCAAAGAC       | CGCCTGTGTACCCTCACCATCGG       |
| <i>Cdkn1a</i> | CCCCAATCGCAAGGATTCTT           | CTTGGTTCGGTGGGTCTGTC          |
| <i>Chrm1</i>  | TCCCAAGGCTCACCCAGATGTC         | GCTCTGTGTGCTTTATTCTGTTGTTCC   |
| <i>Chrm3</i>  | CATAGCACCATCTCAACTCTACCAAG     | GGGCATTTCTCTCTACATCCATAGTCC   |
| <i>Dta</i>    | ACCACGGGACTAAACCTGGTT          | CTTCGTCAGTCCTGGATACGTC        |
| <i>Egfr</i>   | ACACTACGCCGCTGCTTCAAGAG        | ACTGTGCCAAATGCTCCCGAACCC      |
| <i>Gapdh</i>  | ACTCCACTCACGGCAAATTCAACGGCACAG | GGGTCTCGCTCCTGGAAGATGGTGATGGG |
| <i>Kit</i>    | TGGTTGTGGTTGTTGTTGTTGTTG       | GAAGGCTTGTTCGGAAGTGTAGAC      |
| <i>Krt5</i>   | TCCTGTTGAACGCCGCTGAC           | CGGAAGGACACACTGGACTGG         |
| <i>Krt7</i>   | CGCCGCTGAGTGTGGACATCG          | CTGGCTGCTCTTGGCTGACTTCTG      |
| <i>Krt8</i>   | GGAGGAGAGCAGGCTGGAGTC          | TGGTGCGGCTGAAAGTGTGTTG        |
| <i>Krt19</i>  | GCCACCTACCTTGCTCGGATTG         | GTCTCTGCCAGCGTGCCTTC          |
| <i>MKi67</i>  | CATACCTGAGCCCATCACCA           | GCTTTGCTGCATTCCGAGTA          |
| <i>Mist1</i>  | GCTGACCGCCACCATACTTAC          | TGTGTAGAGTAGCGTTGCAGG         |
| <i>Muc19</i>  | CTGGGTCTGGAAGTAGAAGTA          | TCTAAGCCACAGAAGGAGAT          |
| <i>Pmaip1</i> | GCAGAGCTACCACCTGAGTTC          | CTTTTGCGACTTCCCAGGCA          |
| <i>Rsp18</i>  | ATGGCCGTTCTTAGTTGGTG           | GAACGCCACTTGTCCCTCTA          |
| <i>Sox2</i>   | CAGCATGTCCTACTCGCAGCAG         | TGGAGTGGGAGGAAGAGGTAACC       |
| <i>Sox10</i>  | ATCAGCCACGAGGTAATGTCCAAC       | ACTGCCAGCCCGTAGCC             |
| <i>Trp53</i>  | CTCTCCCCCGCAAAGAAAAA           | CGGAACATCTCGAAGCGTTTA         |
| <i>Tubb3</i>  | CCAGAGCCATCTAGCTACTGACACTG     | AGAGCCAAGTGGACTCACATGGAG      |
| <i>Vacht</i>  | GAGTGGGAGATGGGCATGGTTTGG       | GCAGGCAGGTACGACGCAAGAG        |
| <i>Vip</i>    | TCCAGTGATAGGTACTCCATCTC        | CATCCATAGCACACGCAGAA          |

**Table S2. Sequences for human primers used for qPCR**

| <b>Gene target</b> | <b>Forward primer sequence</b> | <b>Reverse primer sequence</b> |
|--------------------|--------------------------------|--------------------------------|
| <i>AMY1</i>        | GGTGTTGCAGGGTTCAGAAT           | TTTTAATTGGCTCACCACCC           |
| <i>AQP3</i>        | GTTTCTGTGTATGTGTATGTCTGCCTTT   | CGTCCCCTGCTCCTACTTATGT         |
| <i>AQP5</i>        | CTGTCCATTGGCCTGTCTGTC          | GGCTCATACGTGCCTTTGATC          |
| <i>CDH1</i>        | AGGTGACAGAGCCTCTGGATAGA        | TGGATGACACAGCGTGAG AGA         |
| <i>CD44</i>        | CTGCCGCTTTGCAGGTGTA            | CATTGTGGGCAAGGTGCTATT          |
| <i>CHRM1</i>       | ACCTCTATAACCACGTACCTG          | TGAGCAGCAGATTCATGACG           |
| <i>CHRM3</i>       | ATCGGTCTGGCTTGGGTC             | CCCGGAGGCACAGTTCTC             |
| <i>EGFR</i>        | TGGCAGGTACAGTAGGATAA           | CAAGTCAGTCTAACGCTCAT           |
| <i>GAPDH</i>       | CAGCCTCAAGATCATCAGCA           | TGTGGTCATGAGTCCTTCCA           |
| <i>GFRA</i>        | CTTCACAGAGCTCACGACAAA          | TCAGCATCAGGACAGACAGC           |
| <i>KIT</i>         | GCAGAGGAAGTGGAAGGCATCAG        | TCAGTGAGACAGTAGCATTATGGAAGGT   |
| <i>KRT5</i>        | CGTGCCGCAGTTCTATATTCT          | ACTTTGGGTTCTCGTGTCAG           |
| <i>KRT7</i>        | TCCGCGAGGTCACCATTAAC           | GCTCTGTCAACTCCGTCTCAT          |
| <i>KRT8</i>        | AAGGATGCCAACGCCAAGTT           | CCGCTGGTGGTCTTCGTATG           |
| <i>KRT19</i>       | GTCTGCCTCCAAGTCTCTGA           | TCTACCCAGAAGACACCCTCCAAA       |
| <i>MIST1</i>       | CGGATGCACAAGCTAAATAACG         | GCCGTCAGCGATTTGATGTAG          |
| <i>NGF</i>         | CAACAGGACTCACAGGAGCA           | GTCTGTGGCGGTGGTCTTAC           |
| <i>NRTN</i>        | CCCTGCCTGTGATGCCATTCTC         | GAGCCGATGACAAGGTCCAGACT        |
| <i>SOX2</i>        | TGGCGAACCATCTCTGTGGT           | GGAAAGTTGGGATCGAACAAAAGC       |
| <i>SOX10</i>       | TCATCCCTTCAATGCCCCCT           | TGCGTCTCAAGGTCATGGAGG          |
| <i>TH</i>          | GTGCTAAACCTGCTCTTCTC           | CGTCTCAAACACCTTCACAG           |
| <i>TUBB3</i>       | CGAAGCCAGCAGTGTCTAAA           | GGAGGACGAGGCCATAAATA           |
| <i>VIP</i>         | CTTGAGTCTCTTATGGGAAAACGTGT     | GTGAAGACTGCATCTGAGTGACG        |

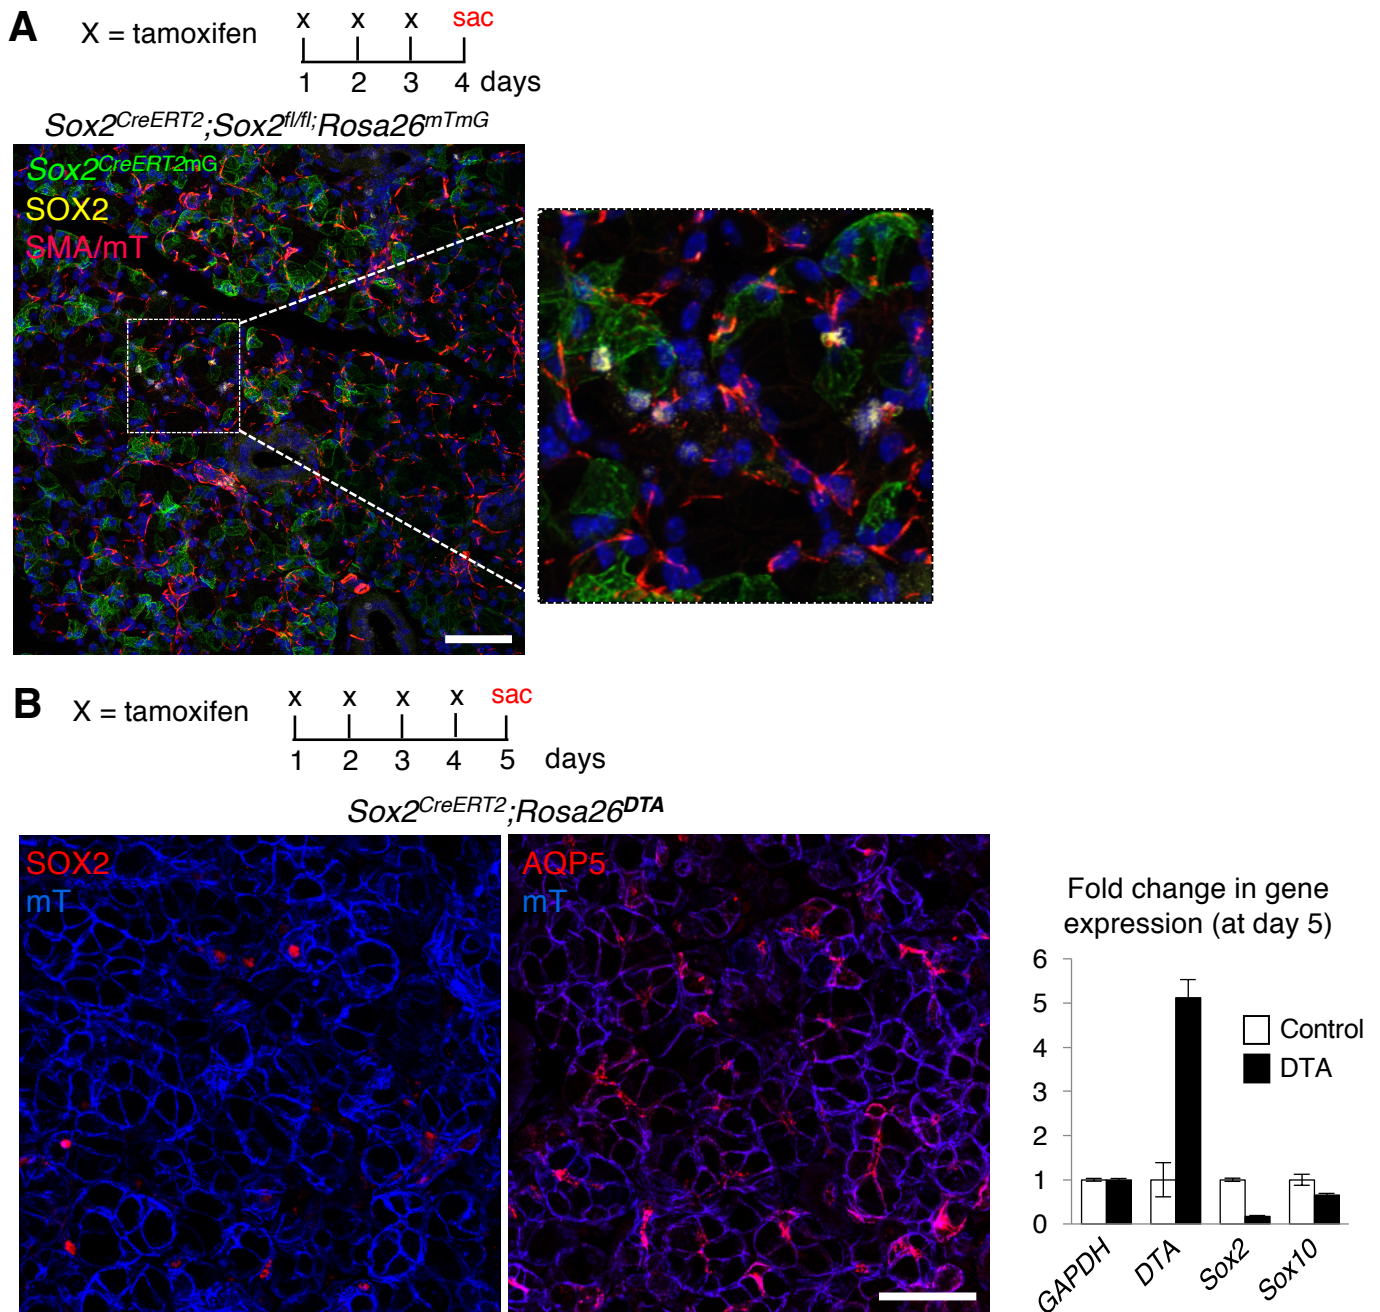

**Figure S1. Short-term ablation of SOX2+ cells reduces acinar cell replacement.** (A) SOX2+ cells were ablated in SLG of *Sox2<sup>CreERT2</sup>; Sox2<sup>fl/fl</sup>; Rosa26<sup>mTmG/+</sup>* mice over 3 days and SLG analyzed on day 4 (see schematic). Sections of *Sox2<sup>CreERT2</sup>; Sox2<sup>fl/fl</sup>; Rosa26<sup>mTmG/+</sup>* SLG were immunostained for SOX2 and myoepithelial cells ( $\alpha$ -smooth muscle actin; SMA). Scale bar = 50  $\mu$ m (B) SOX2+ cells were ablated in SLG of *Sox2<sup>CreERT2</sup> Rosa26<sup>DTA</sup>; Rosa26<sup>mTmG/+</sup>* mice over 4 days and SLG analyzed on day 5 (see schematic). Sections of *Sox2<sup>CreERT2</sup> Rosa26<sup>DTA</sup>* SLG were immunostained for SOX2 and acinar cells (aquaporin 5; AQP5) or subjected to qPCR. Scale bar = 50  $\mu$ m.

Data information: Data in B were normalized to *Gapdh* and the wild-type control. Data is mean+S.D. (n=1, 3 technical replicates).

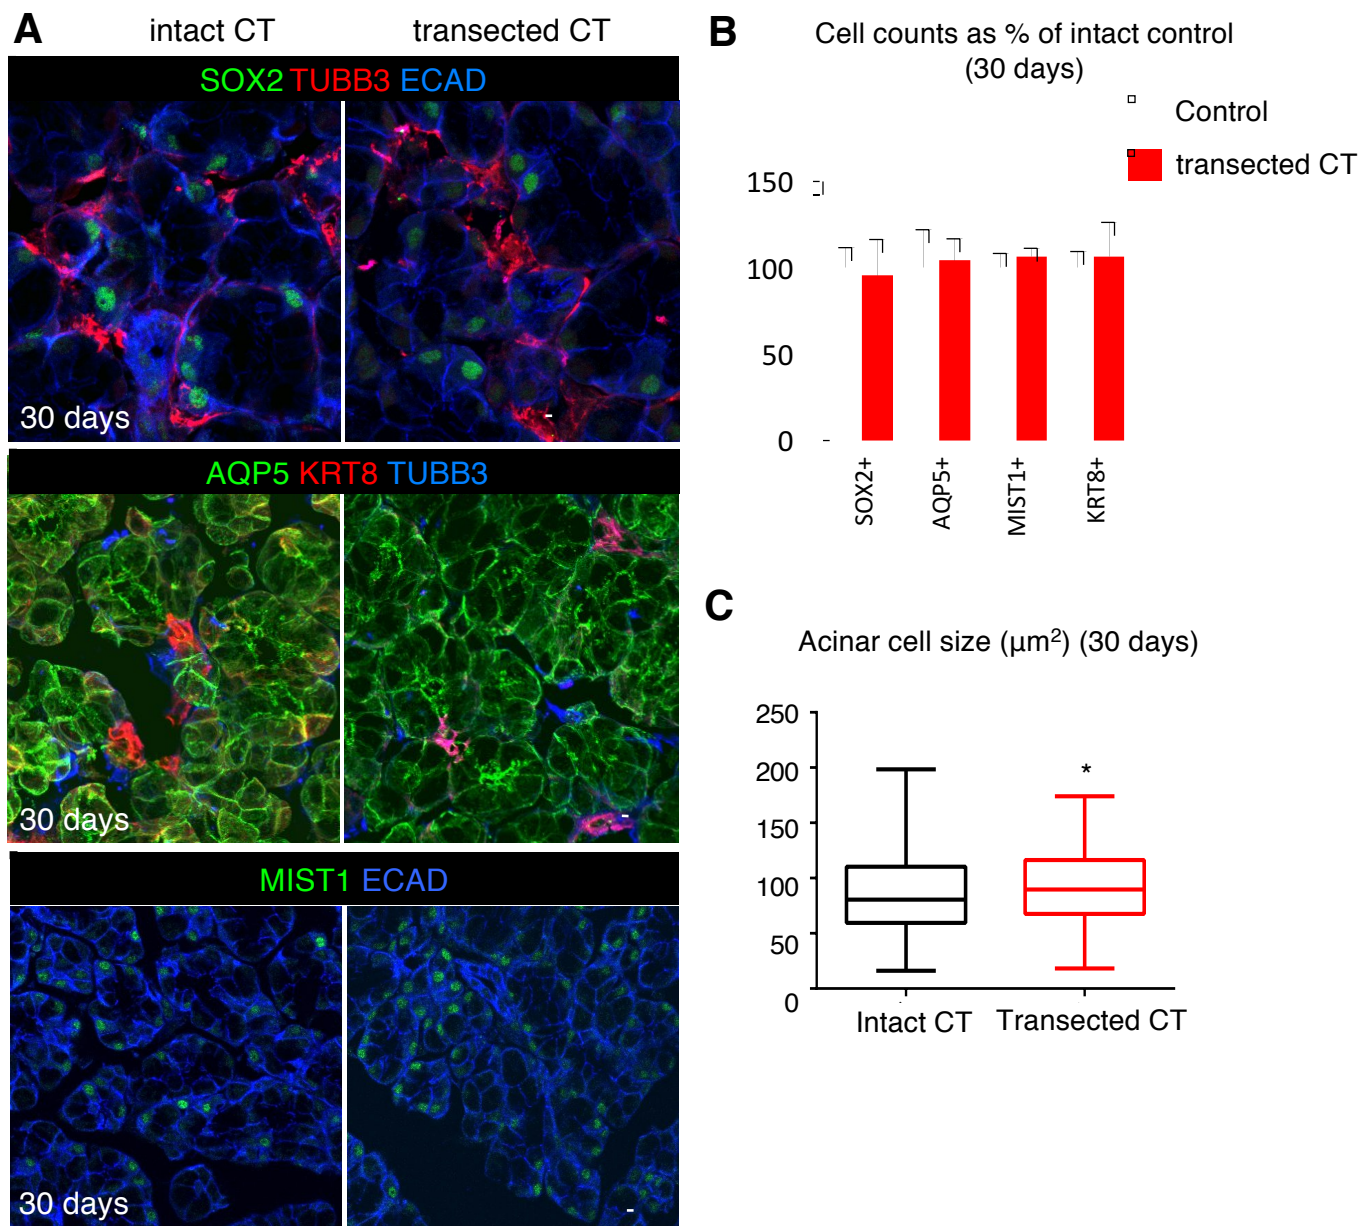

**Figure S2. Reinnervation 30 days following transection of the chorda tympani restores the acinar lineage (A-C)** SLG were immunostained for SOX2, TUBB3, AQP5, MIST1 and ECAD (A) and numbers of SOX2+, AQP5+, MIST1+ and KRT8+ cells (B) as well as acinar cells size (C) was measured 30 days after denervation.  $n = 5$  mice per time point per condition. Cells were counted in 3-4 fields of view per animal. Data information: Data in B and C  $n=5$ . Data in B are mean+S.E.M and were analyzed using a one-way analysis of variance test, data in C are a box and whisker plot of  $n=5$  mice, showing mean+S.E.M. and were analyzed using students  $t$ -test.  $*p = 0.0498$ .
