# Supplementary material for: Salivary glands regenerate after radiation injury through SOX2‐mediated secretory cell replacement
Source: PubMed Central journal article supplement (PMC5840548; doi:10.15252/emmm.201708051), 2018-01-15
Supplement: EMMM-10-e8051-s002.pdf [file EMMM-10-e8051-s002.pdf]

## Expanded View Figures

### Figure EV1. SOX2 marks a subset of acinar cells that replenish acini.

- A Wild-type murine PG stained for SOX2, ECAD, and nuclei. Scale bar is 50  $\mu\text{m}$ .
- B The percentage of acinar SOX2<sup>+</sup> and SOX2<sup>-</sup> cells that are Ki67<sup>+</sup> were counted using FACS and shown as a percentage of total AQP5<sup>+</sup>SOX2<sup>+</sup> or AQP5<sup>+</sup>SOX2<sup>-</sup> cells.
- C The % of SOX2<sup>+</sup> acinar cells that are either CyclinD1<sup>+</sup> or CyclinD1<sup>-</sup>.
- D Schematic of *Rosa26<sup>mTmG</sup>* Cre-mediated gene excision (adapted from Muzumdar et al, 2007).
- E Representative image of *Sox2* lineage-traced SLG. Cre-mediated recombination was induced in *Sox2<sup>CreERT2</sup>;Rosa26<sup>mTmG</sup>* mice and SLG analyzed 14 or 30 days later by immunostaining for SOX2. Scale bar = 25  $\mu\text{m}$ .
- F Representative images of *Kit* lineage-traced SLG and SMG. Cre-mediated recombination was induced in *Kit<sup>CreERT2</sup>;Rosa26<sup>mTmG</sup>* mice and SMG/SLG analyzed 14 days and 6 months later. Tissue was stained with AQP5 to mark acinar cells and KRT8 to mark intercalated duct cells. Scale bar = 25  $\mu\text{m}$ . mT = membrane-bound Tomato.

Data information: Data in (B), SLG were pooled from  $n = 2$  mice (85,000 events). Data in (C) were calculated from three non-consecutive fluorescent sections of each SLG from  $n = 3$  mice with individual values plotted. Error bars show mean  $\pm$  SD.

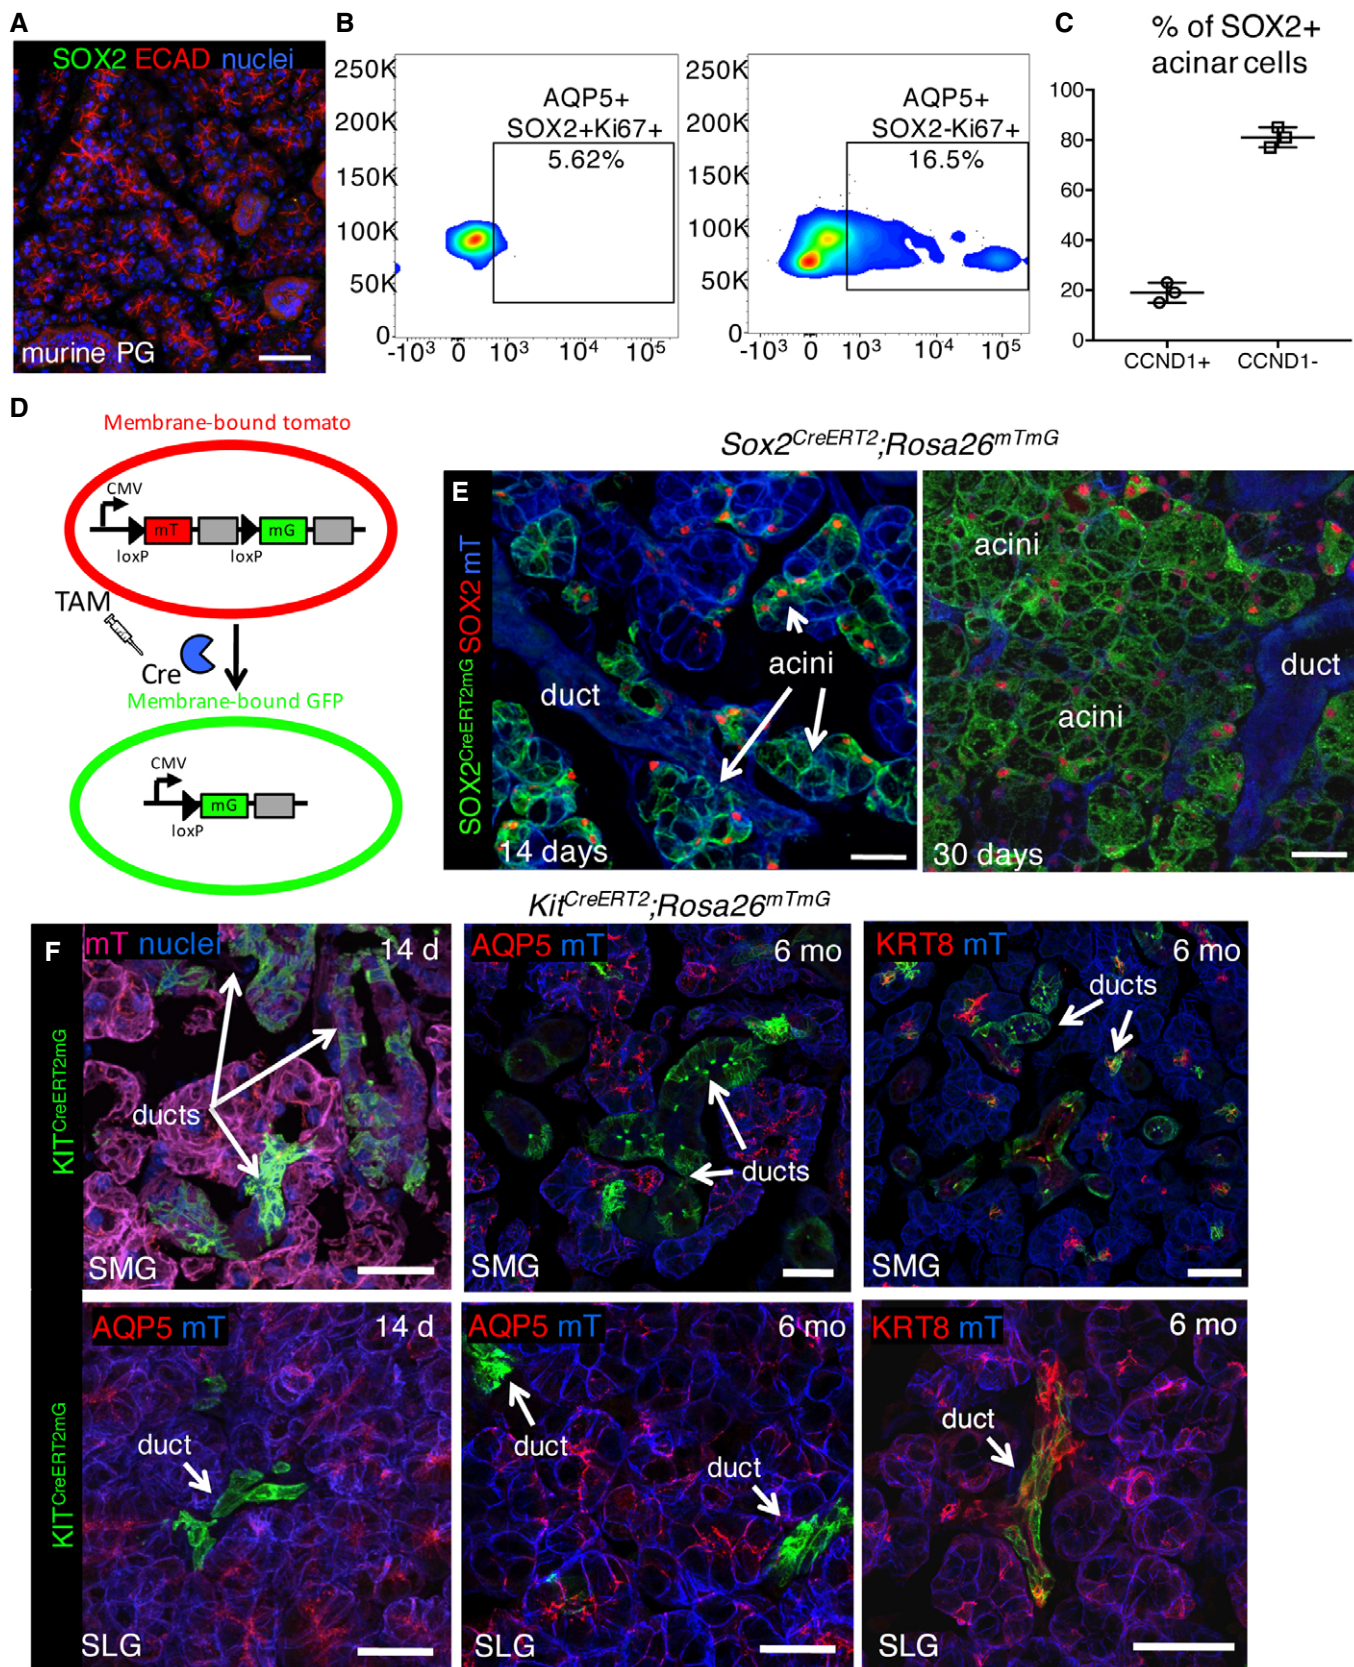

Figure EV1.



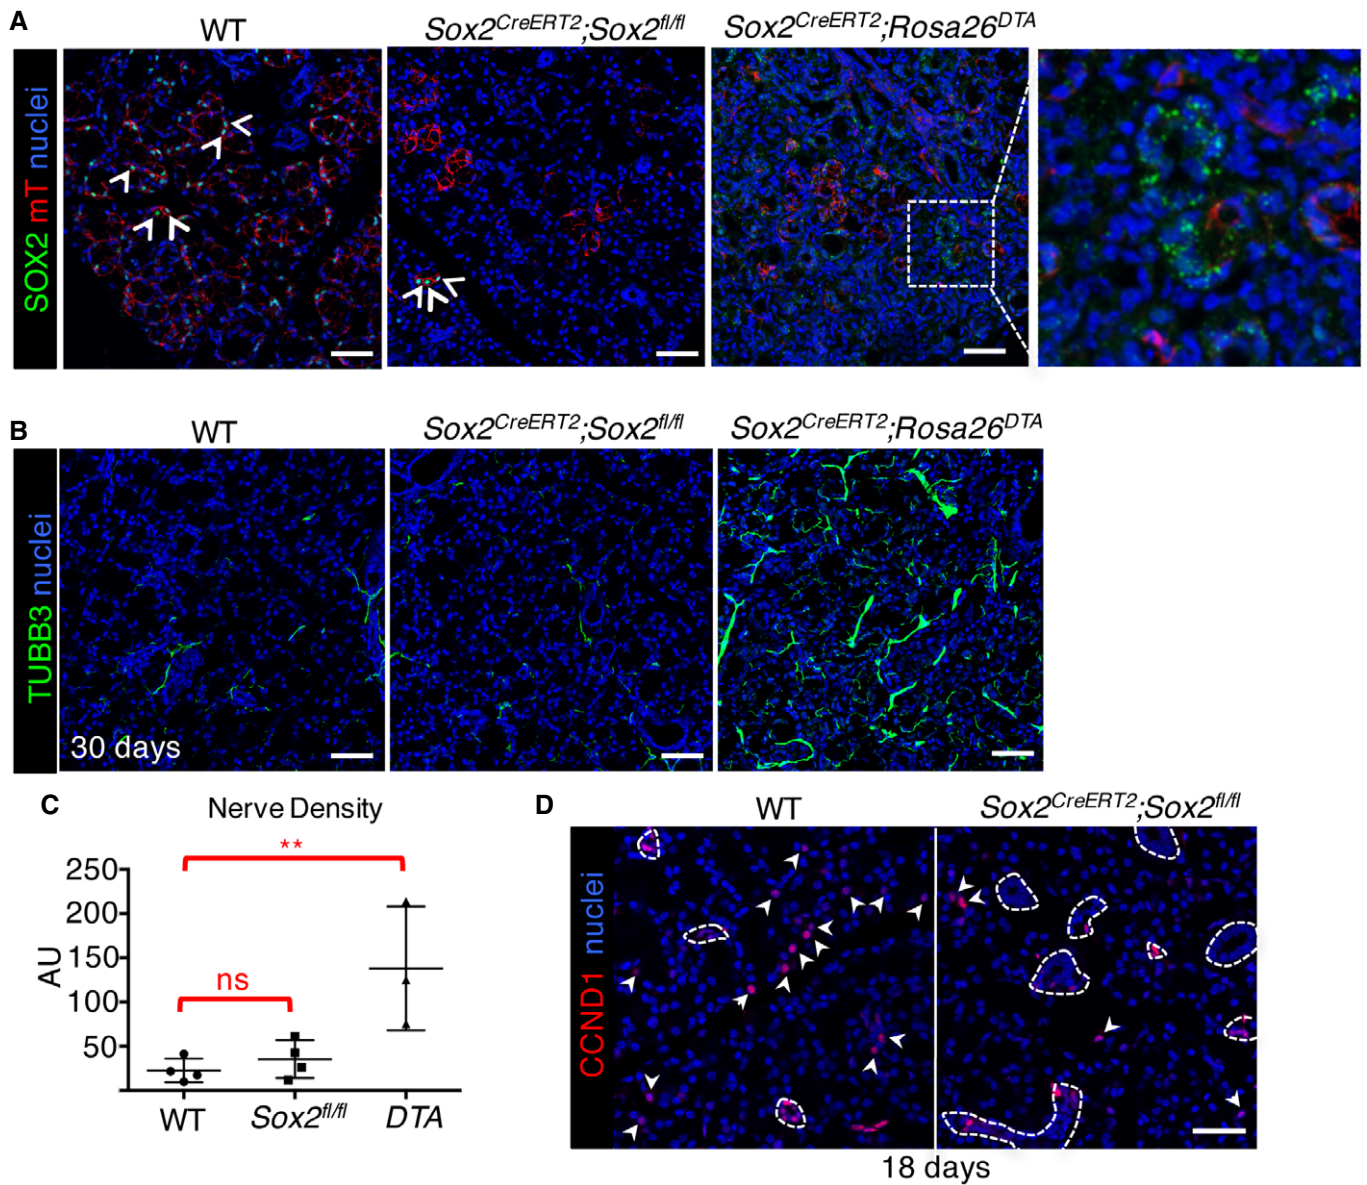

**Figure EV2. Ablation of Sox2 or SOX2<sup>+</sup> cells reduces acinar cell replacement despite the presence of nerves.**

A–C *Sox2* or SOX2<sup>+</sup> cells were ablated in SLG of *Sox2<sup>CreERT2</sup>; Sox2<sup>fl/fl</sup>; Rosa26<sup>mTmG/+</sup>* mice (Fig 2A; see schematic) or *Sox2<sup>CreERT2</sup>; Rosa26<sup>DTA</sup>; Rosa26<sup>mTmG/+</sup>* mice (Fig 2B; see schematic). (A, B) Sections of WT, *Sox2<sup>CreERT2</sup>; Sox2<sup>fl/fl</sup>*, and *Sox2<sup>CreERT2</sup>; Rosa26<sup>DTA</sup>* SLG were immunostained for SOX2 or TUBB3 and nuclei. White arrowheads indicate SOX2<sup>+</sup> cells. White dotted square is magnified in the image to the right to highlight that there are few SOX2<sup>+</sup> cells remaining in tissue and that non-nuclear (green) staining is suggestive of debris. Scale bar = 50 μm. (C) Raw integrated density of nerves was calculated using ImageJ.

D WT or *Sox2<sup>CreERT2</sup>; Sox2<sup>fl/fl</sup>* SLG immunostained for cyclin D1 (CCND1) and nuclei. Dashed lines = ducts; arrowheads = CCND1<sup>+</sup> acinar cells. Scale bar = 50 μm.

Data information: Data in (C), WT *n* = 4, *Sox2<sup>fl/fl</sup>* *n* = 4, DTA *n* = 3. Individual values were plotted, as means + SD, and data were analyzed using a one-way analysis of variance with *post hoc* Dunnett's test. \*\**P* = 0.0091. Data in (D) are a representative image from *n* = 4 mice.

**Figure EV3. Transection of the chorda tympani depletes acinar cells at 7 days.**

A–G (A, C, D, G) Control and nerve transected SLG were immunostained 7 days after denervation for tyrosine hydroxylase (TH; A), SOX2 and TUBB3 (C), KRT5 (D), caspase-3 (CASP3; G), epithelial cells (ECAD), and nuclei. Quantification of the size of acinar cells (B) in adult wild-type (WT) SLG with intact or transected chorda tympani (CT) 7 days after denervation. Scale bars in (A, C, D, G) = 25  $\mu\text{m}$ . (E, F) Recombination was induced in *Sox2<sup>CreERT2</sup>;Rosa26<sup>mTmG</sup>* mice 24 h before nerve transection and SLG traced for 15 days before being immunostained for TUBB3. The percentage of GFP<sup>+</sup> and mT<sup>+</sup> acinar cells in control and transected glands are shown in (F). Scale bar in (E) = 25  $\mu\text{m}$ . (H) Fold change in expression of genes involved in cell cycle and apoptosis 7 days after denervation, compared to intact control. Dashed line denotes the intact control.

Data information: Data in (B, F, and H)  $n = 5$ . Data in (B) are a box and whisker plot of  $n = 5$  mice, showing means (horizontal line), upper and lower quartiles (box) and upper and lower values (whiskers) and were analyzed using Student's *t*-test. \*\*\* $P = 0.00000347$ . Data in (F) are means + SD and were analyzed by Student's *t*-test. %GFP<sup>+</sup> \*\*\* $P = 0.0000208$ , %mT<sup>+</sup> \*\*\* $P = 0.0000208$ . Data in (H) were normalized to *Rsp18* and the intact control (dashed line). *Ccnd1* \* $P = 0.0477$ .



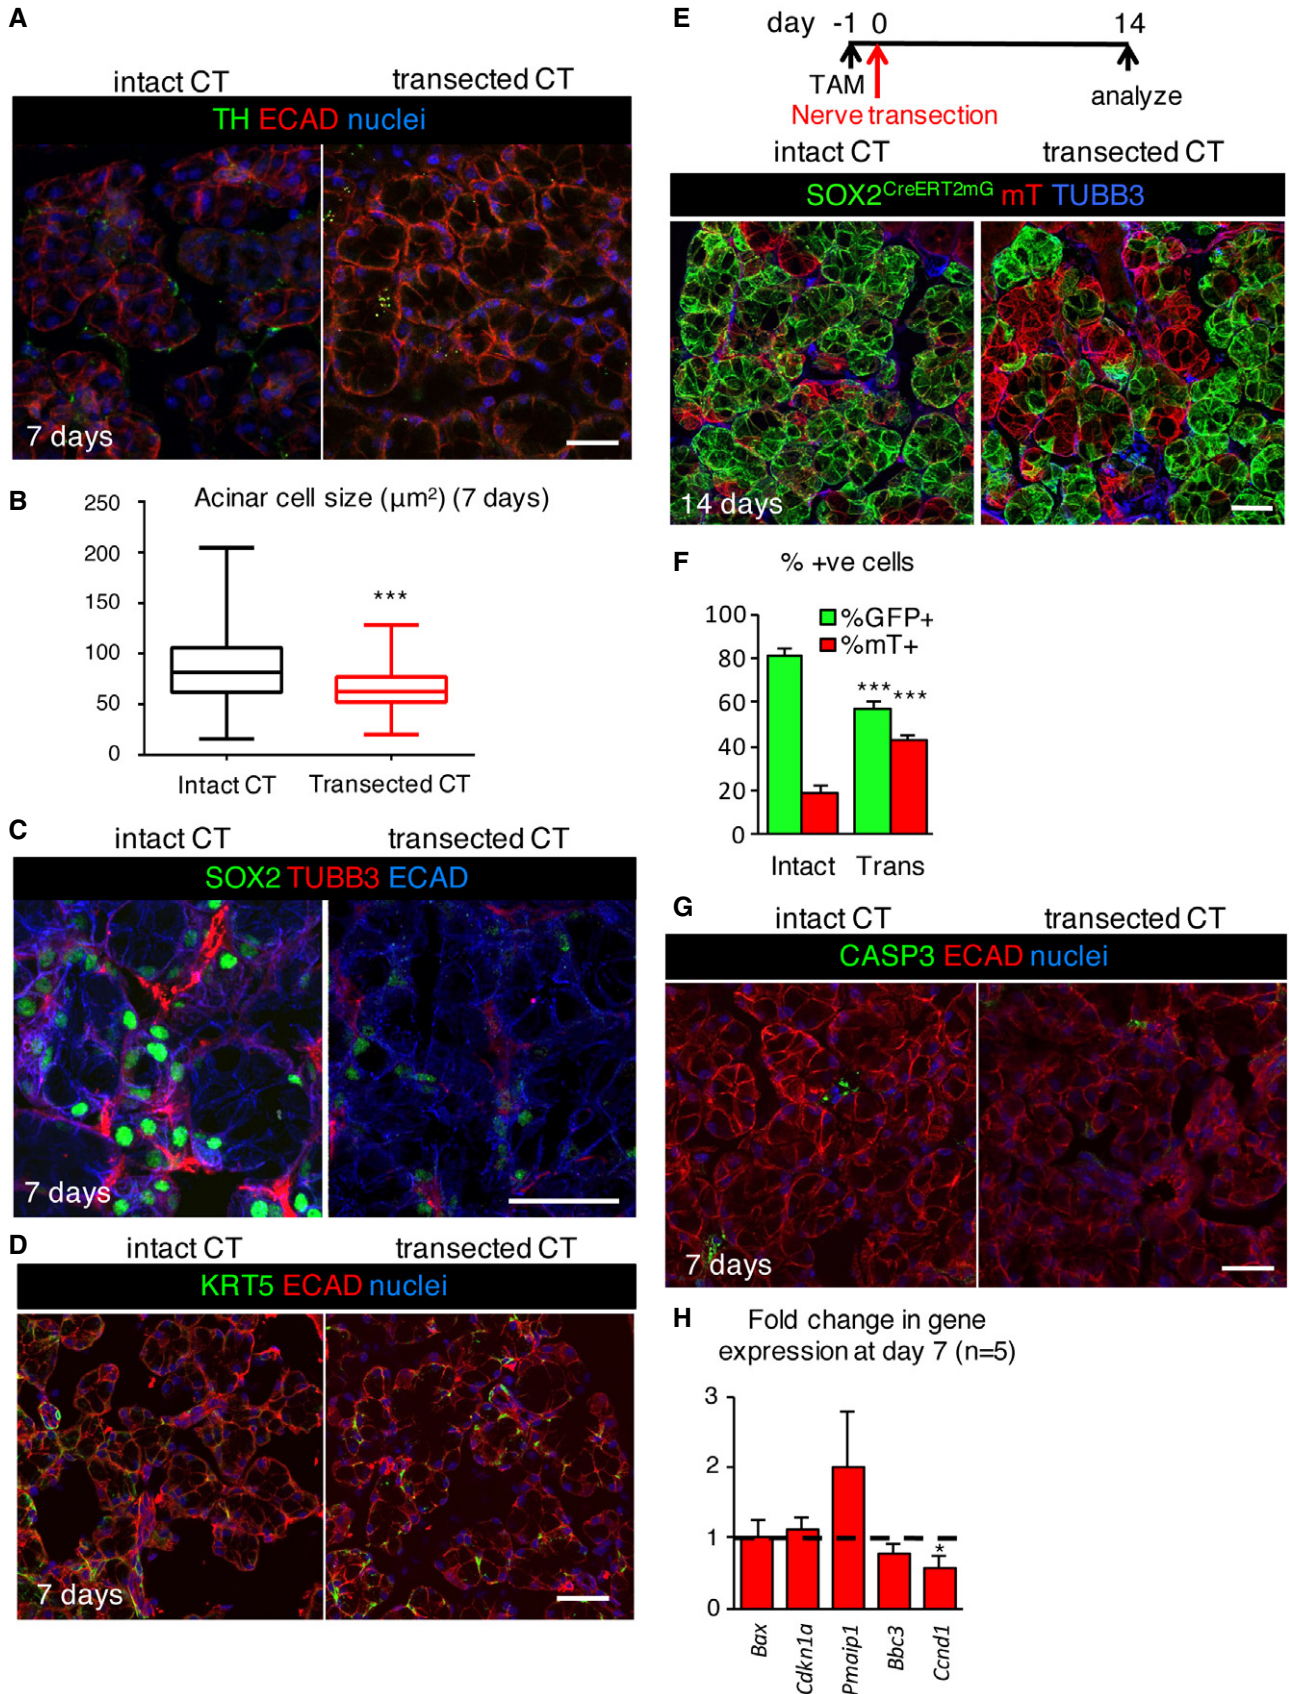

Figure EV3.

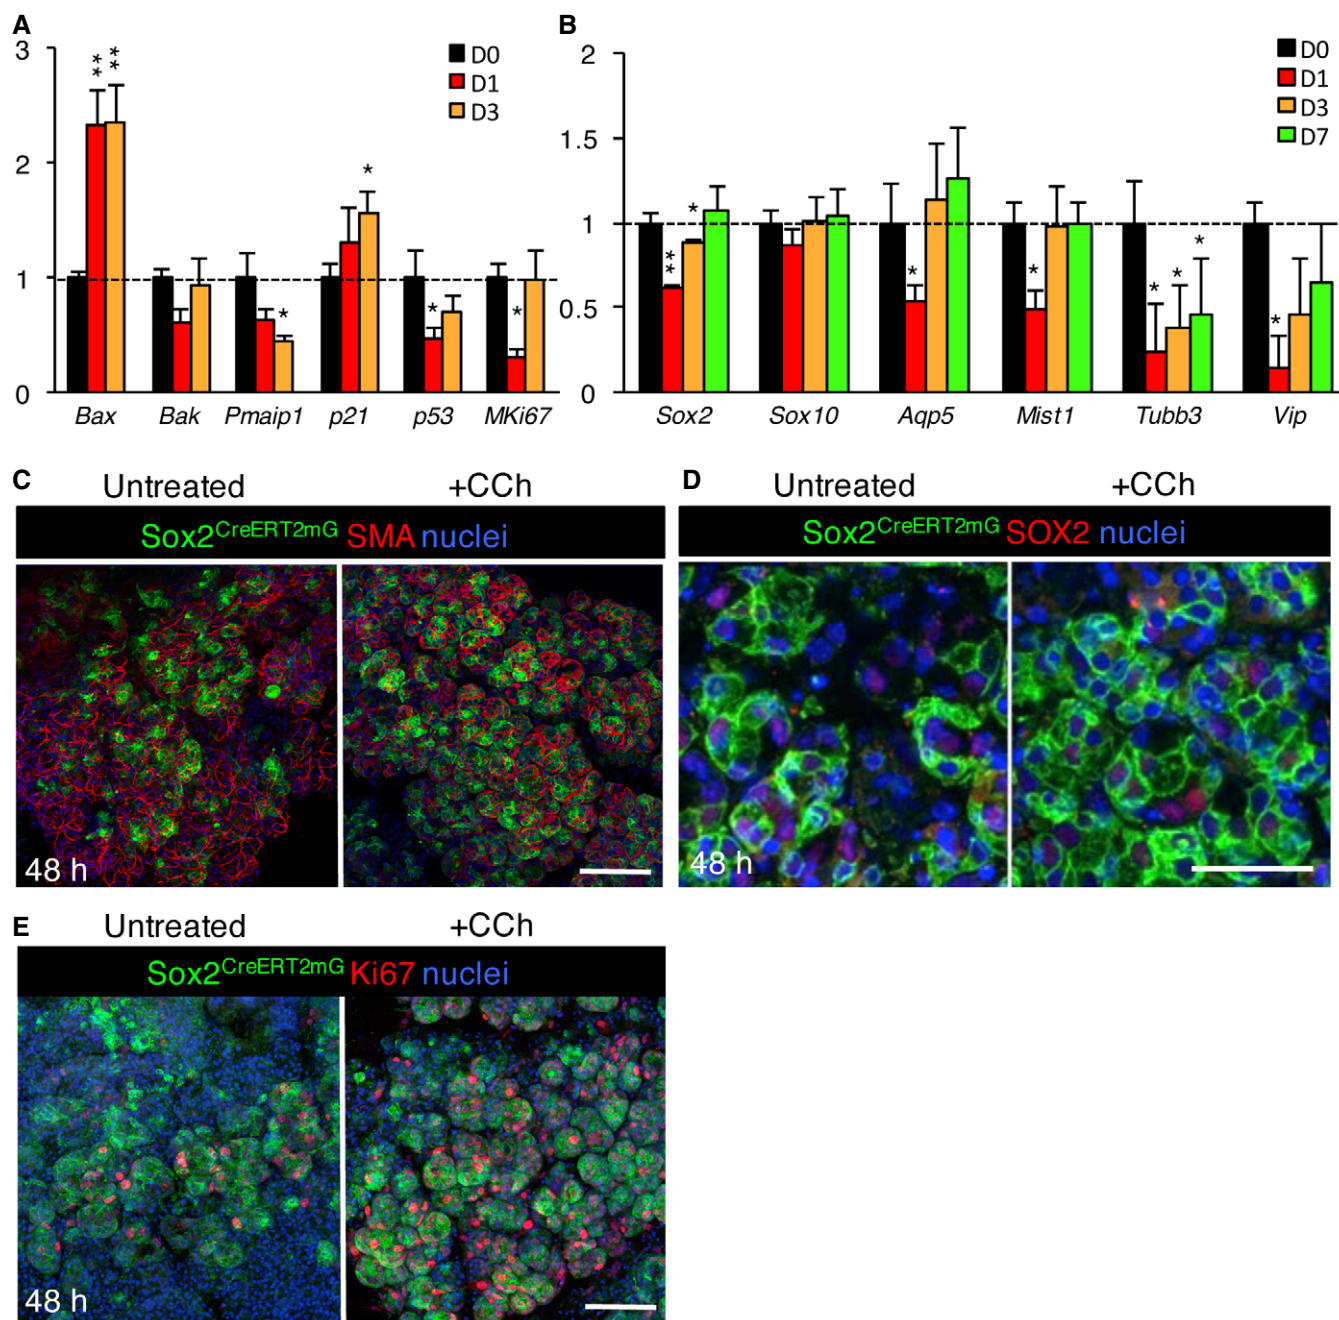

**Figure EV4.** IR induces cellular damage and a loss of nerves and SOX2 and SOX2<sup>+</sup> progenitors can replenish mouse acinar cells in response to cholinergic mimetics.

A, B Murine SLG was analyzed for transcriptional changes by qPCR at days 0, 1, 3, and 7 days following 10 Gy of IR.

C–E *Sox2<sup>CreERT2</sup>;Rosa26<sup>mTmG</sup>* murine SLG explants cultured *ex vivo* for 48 h and immunostained for smooth muscle actin (SMA, C), SOX2 (D) or Ki67 (E) and nuclei.

Recombination was induced 24 h before SLG was harvested for culture. Scale bar = 50  $\mu$ m.

Data information: Data in (A and B) were normalized to *Rsp29* and the day 0 control. Data in (A and B) ( $n = 3$  per time point) are means + SEM and were analyzed using a one-way analysis of variance with a *post hoc* Dunnett's test. *Bax* (D1)  $**P = 0.00826$ , *Bax* (D3)  $**P = 0.0871$ , *Pmaip1* (D3)  $*P = 0.0369$ , *p21* (D3)  $*P = 0.0481$ , *p53* (D1)  $*P = 0.0337$ , *MKi67* (D1)  $*P = 0.0319$ , *Sox2* (D1)  $**P = 0.0072$ , *Sox2* (D3)  $*P = 0.0418$ , *Aqp5* (D1)  $*P = 0.0421$ , *Mist1* (D1)  $*P = 0.0432$ , *Tubb3* (D1)  $*P = 0.0467$ , *Tubb3* (D3)  $*P = 0.0470$ , *Tubb3* (D7)  $*P = 0.0489$ , *Vip* (D1)  $*P = 0.0402$ . Images in (C, D, and E) are representative of three experiments,  $n = 3$  SLG fragments per experiment.

**Figure EV5. Muscarinic activation is sufficient to increase SOX2 expression and the acinar lineage in human adult salivary gland.**

- A Human salivary gland obtained from healthy individuals (no IR; submandibular) or patients who received radiation therapy for head and neck cancer (IR) were subjected to qPCR.
- B Representative images of adult human (h) salivary gland (non-IR, 22–31 years; SMG) immunostained for endogenous SOX10, MIST1, EGFR, CD44, KRT7, AQP3, KRT5, ECAD, and nuclei. Single arrowheads indicate SOX10-expressing acinar and ductal cells. Scale bars = 50  $\mu$ m.
- C Quantification of number of Ki67<sup>+</sup> cells in nerve co-culture (representative images shown in Fig 7C).
- D Adult human salivary gland explants (SMG or PG) from four individual patients (healthy, non-IR) were cultured for 4 h  $\pm$  200 nM CCh. Pooled data presented in Fig 7E.

Data information: Data in (A)  $n = 11$  for no IR and  $n = 7$  for IR; 30–85 years. Data were normalized to *GAPDH* with individual values plotted and analyzed using a Student's *t*-test with a false discovery rate set to 0.05. Error bars show mean  $\pm$  SD. *TUBB3*  $P = 0.346$ , *VIP*  $P = 0.461$ , *GFRA*  $P = 0.002$ , *TH*  $P = 0.433$ . Data in (C) are  $n = 3$  and mean + SEM and were analyzed using a Student's *t*-test. \* $P = 0.0151$ . Data in (D) ( $n = 4$  separate individuals) were normalized to *GAPDH* expression and salivary gland from the same individuals cultured with no CCh (control; black dashed line) and run in triplicate and are presented as mean + SD.



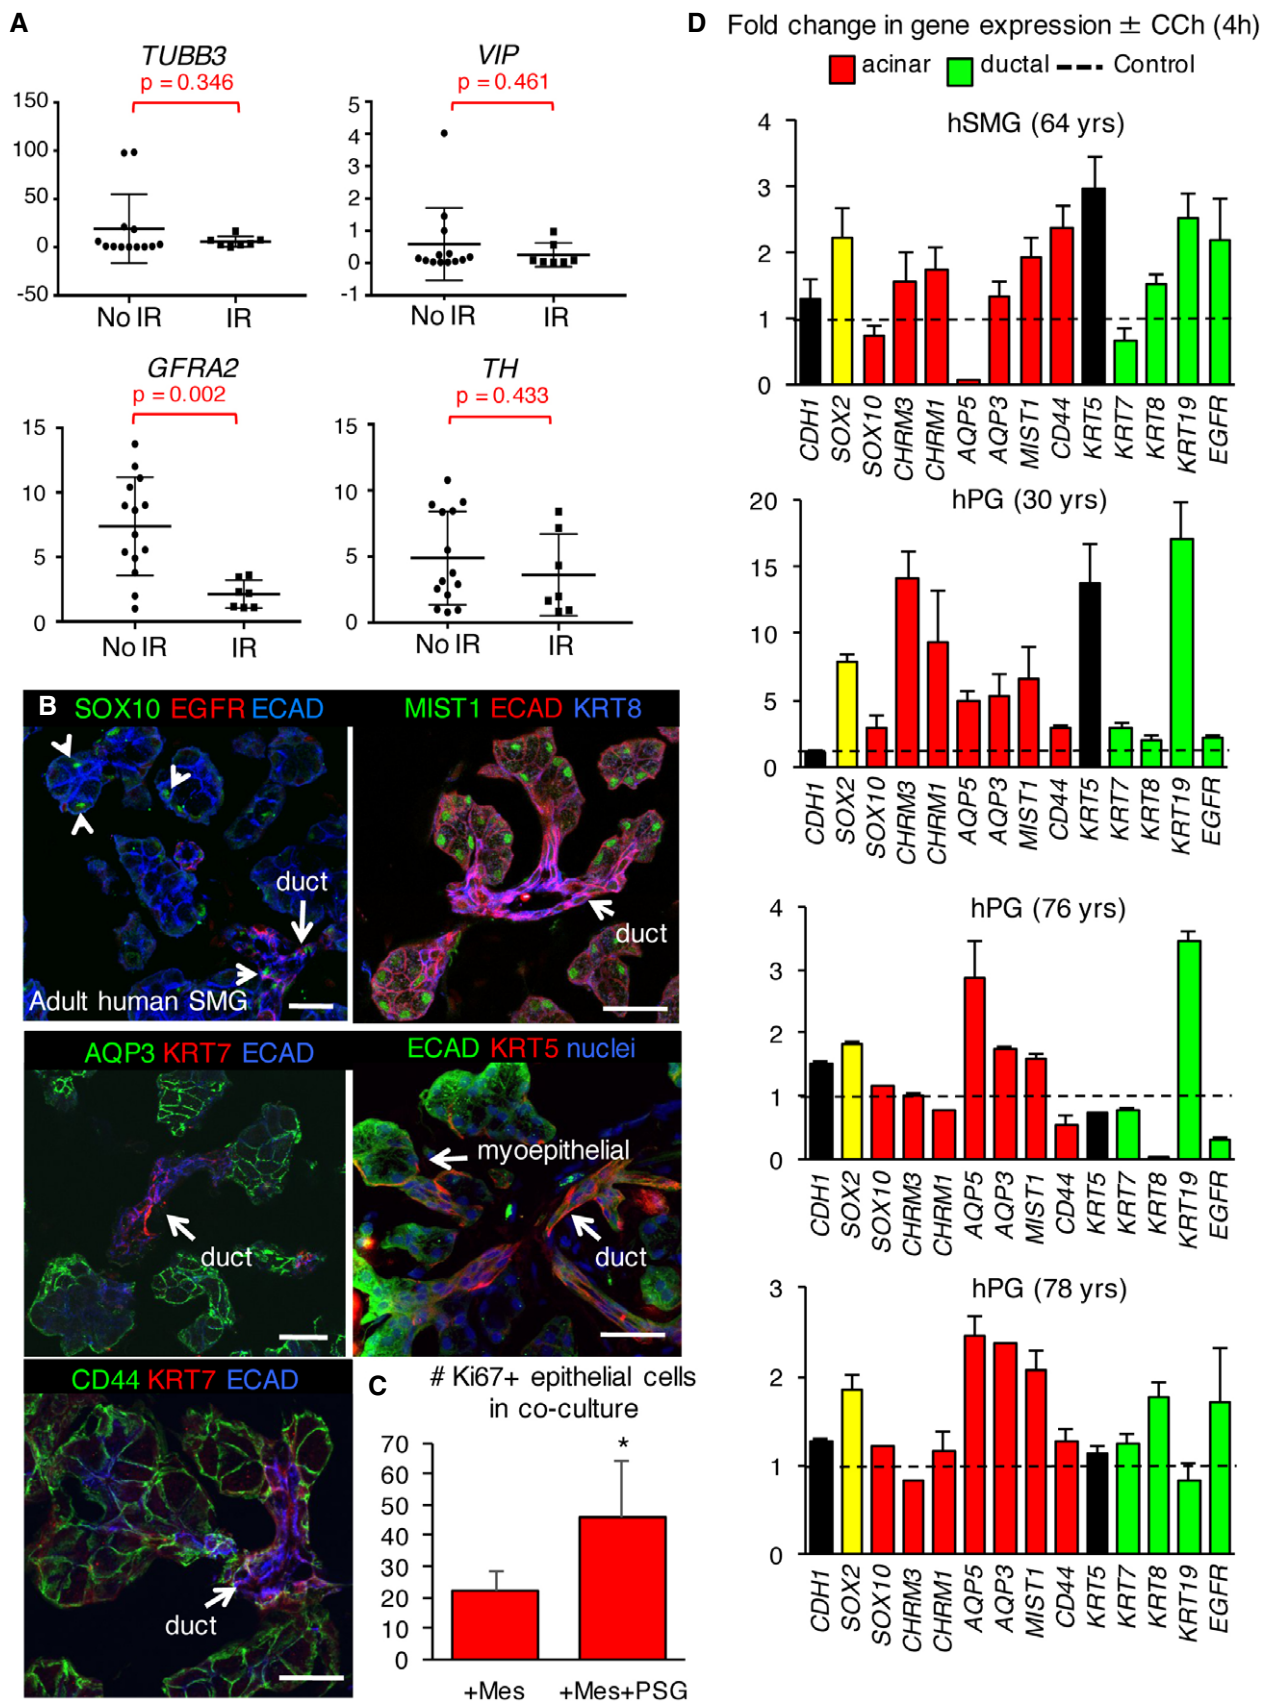

Figure EV5.
